# Supplementary material for: An All-Solid-State Coaxial Structural Battery Using Sodium-Based Electrolyte
Source: MDPI journal article supplement (doi:10.3390/molecules26175226), 2021-08-28
Supplement: s1 [file s1]

## Support Information

### An all-solid-state coaxial structural battery using sodium-based electrolyte

Federico Danzi<sup>a,b,\*</sup>, Pedro Ponces Camanho<sup>b,c</sup>, and Maria Helena Braga<sup>a,b\*</sup>

<sup>a</sup>LAETA, Engineering Physics Department, Engineering Faculty, University of Porto,  
Rua Dr. Roberto Frias, s/n, 4200-465, Porto, Portugal.

<sup>b</sup>INEGI, Institute of Science and Innovation in Mechanical and Industrial Engineering,  
Rua Dr. Roberto Frias, 400, 4200-465, Porto, Portugal.

<sup>c</sup>LAETA, Mechanical Engineering Department, Engineering Faculty, University of Porto,  
Rua Dr. Roberto Frias, s/n, 4200-465, Porto, Portugal. Email: pcamanho@fe.up.pt

\*Correspondence to: fdanzi@inegi.up.pt (F.D.), mbraga@fe.up.pt (M.H.B.)

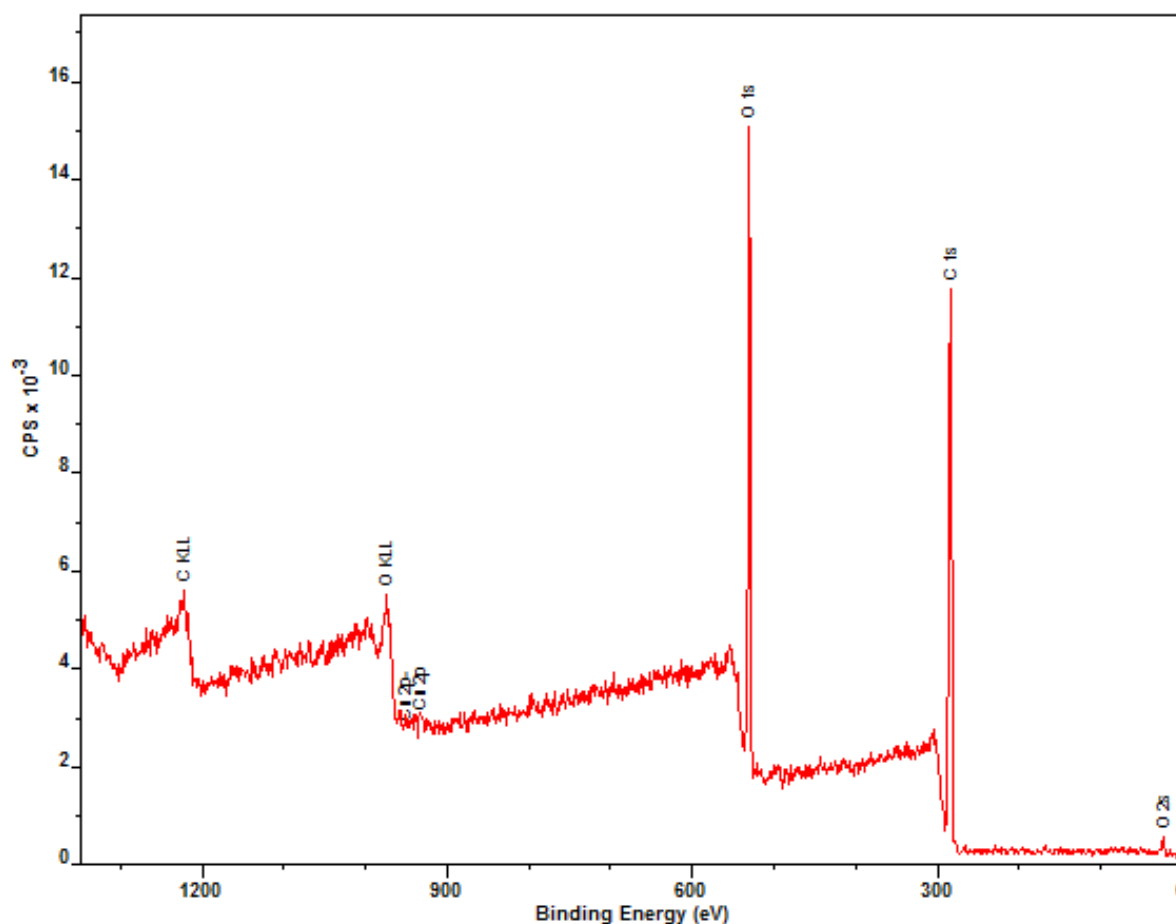

**Figure S1.** Polyvinyl acetate (PVAc – C<sub>4</sub>H<sub>6</sub>O<sub>2</sub>) composite on Cu substrate. XPS survey in full spectra.

**Table S1.** The atomic percentage of the elements constituting the polymer used to prepare a composite with the ferroelectric Na-glass electrolyte constituted essentially by polyvinyl acetate (PVAc – C<sub>4</sub>H<sub>6</sub>O<sub>2</sub>) on Cu substrate (the polymer in this analysis contained no Na-glass).

**Analysis of ROI (normalized to 100%)**

| Element | Sensitivity Factor | At % Pol_Cu |
|---------|--------------------|-------------|
| C 1s    | 0.278              | 68.8        |
| O 1s    | 0.78               | 30.9        |
| Cu 2p3  | 3.547              | 0.3         |

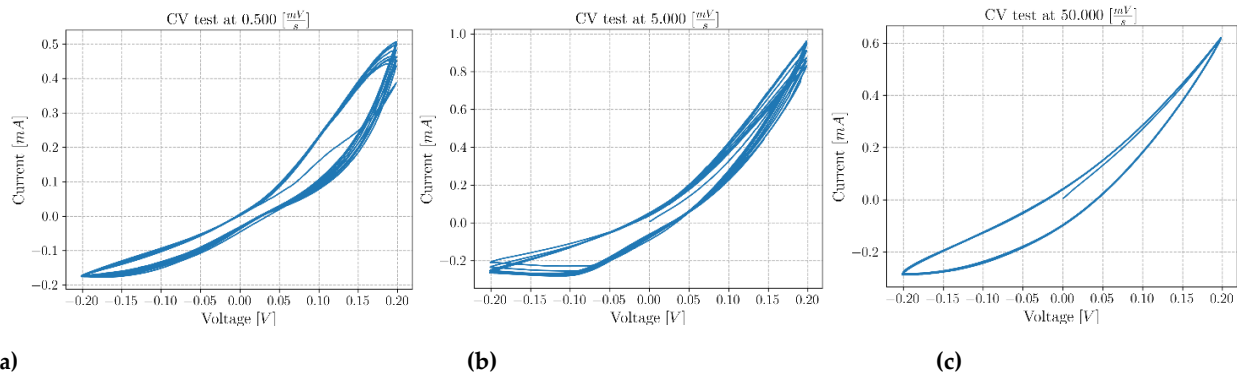

**Figure S2.** Typical cyclic voltammetry curves for a coaxial structural battery at different scan-rates at 40°C (OCV set to 0 V); (a) 0.5 mV/s, (b) 5.0 mV/s and 50 mV/s.

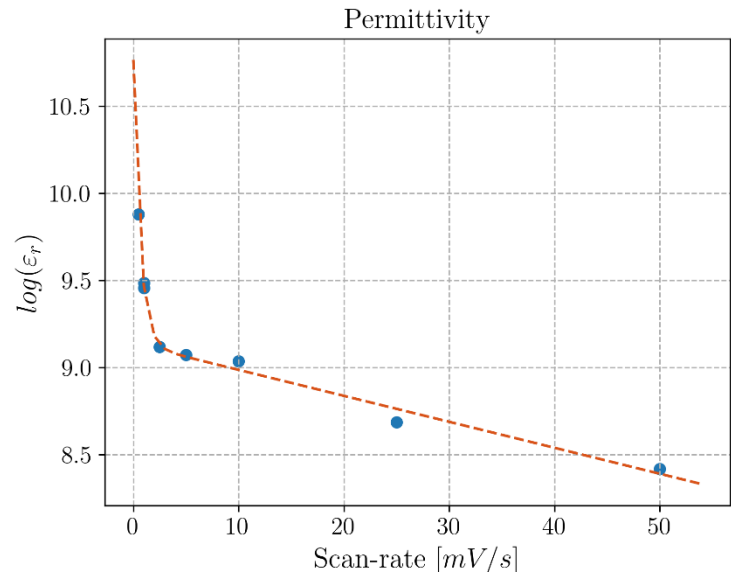

**Figure S3.** All-solid-state structural coaxial battery cell permittivity was obtained by cyclic voltammetry for different scan-rates at 40 °C with two-phase exponential decay curve fitting.

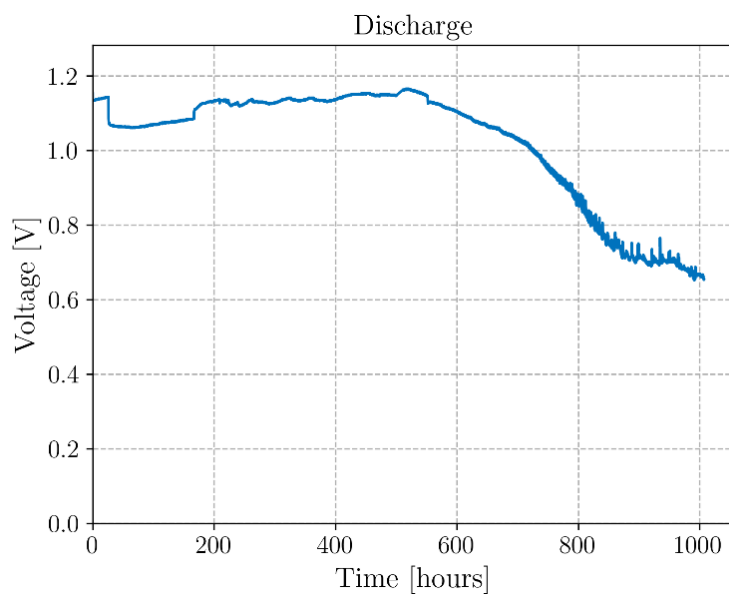

**Figure S4.** Discharge curves of all-solid-state structural coaxial batteries with 1.8 k $\Omega$  material resistors at 40°C (the external resistor was connected to the cell after 25 h).

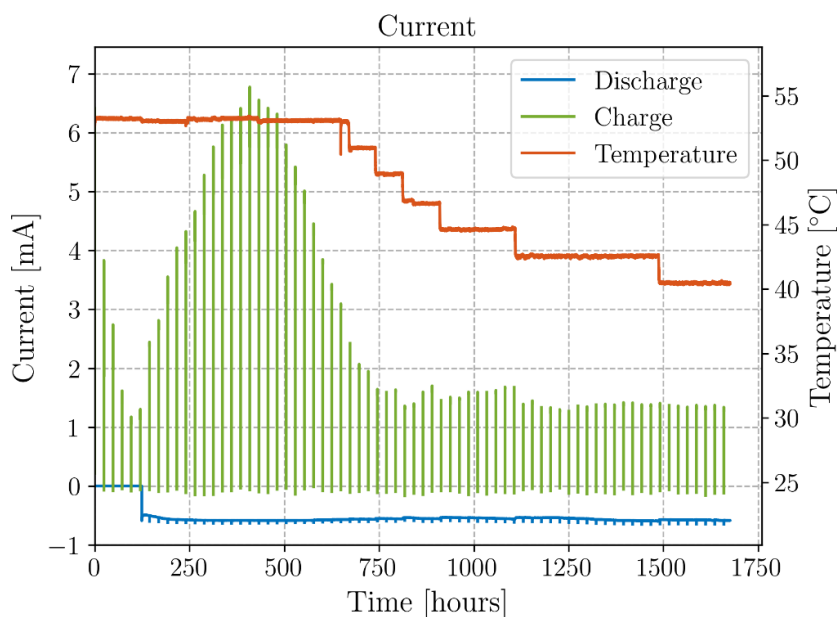

**Figure S5.** Charge and discharge currents corresponding to the flexural bending post-mortem electrochemical cycling in Figure 9 in which charge is performed at a constant voltage of 1.3 V for 3 min and discharge performed with a material resistor of 1.8 k $\Omega$  for 24 h. The temperature varied from ~53 to 40°C.
